# Supplementary material
Source: PubMed Central journal article supplement (PMC3396158)
Supplement: supp_00177.2010_supmat.pdf [file supp_00177.2010_supmat.pdf]

## Supplemental Material

### Modeling of slow activated $\text{Ca}^{2+}$ -sensitive $\text{K}^+$ channels dependent bursting and $[\text{Ca}^{2+}]_i$ oscillations

Equations and coefficients for channels and pumps are taken from previous model (1) or represented in this supplemental material. Slow activated  $\text{Ca}^{2+}$ -sensitive  $\text{K}^+$  channels were modeled as well as the fast activated  $\text{Ca}^{2+}$ -sensitive  $\text{K}^+$  channels with considerably increased time-dependent parameters for activation reported in (2).

The units are: time in milliseconds (ms), voltage in millivolts (mV), concentration in micromoles/liter ( $\mu\text{M}$ ), current in femtoamperes (fA), conductance in picosiemens (pS), capacitance in femtofarads (fF). Numerical integration of the model was carried out using standard numerical methods (1). This model is available for direct simulation on the website “Virtual Cell” ([www.nrcam.uchc.edu](http://www.nrcam.uchc.edu)) in available for direct simulation on the website “Virtual Cell” ([www.nrcam.uchc.edu](http://www.nrcam.uchc.edu)) in “MathModel Database” on the “math workspace” in the library “Fridlyand” with name “SlowCa2+acted Kchan”.

**$\text{Ca}^{2+}$  current ( $I_{\text{VCa}}$ ).**

$$I_{\text{VCa}} = g_{\text{mVCa}} d_{\text{Ca}} f_{\text{VCa}} (V_P - E_{\text{Ca}}) \quad (1)$$

$$\frac{d d_{\text{Ca}}}{dt} = \frac{d_{\text{Cab}} - d_{\text{Ca}}}{\tau_{d\text{Ca}}} \quad (2)$$

$$d_{\text{Cab}} = \frac{1}{1 + \exp[(2 - V_P)/10.5]} \quad (3)$$

$$\tau_{d\text{Ca}} = 2.2 - 1.79 \cdot \exp[-(V_P - 9.7)/70.2]^2 \quad (4)$$

$$f_{V_{Ca}} = f_{V_{Cab}} = \frac{1}{1 + \exp[(-15 + V_P)/6]} \quad (5)$$

where  $g_{mV_{Ca}} = 800$  pS,  $E_{Ca} = 100$  mV.

***Delayed Rectifier  $K^+$  current ( $I_{Kr}$ ).***

$$I_{Kr} = g_{mKr} d_{Kr}^2 f_{Kr} (V_P - E_K), \quad (6)$$

$$\frac{d d_{Kr}}{dt} = \frac{d_{Krb} - d_{Kr}}{\tau_{dKr}} \quad (7)$$

$$d_{Krb\infty} = \frac{1}{1 + \exp[(-9 - V_P)/5]} \quad (8)$$

where  $g_{mKr} = 30000$  pS,  $\tau_{dKr} = 23$  mc,  $E_K = -75$  mV.

***Fast  $Ca^{2+}$ -activated  $K^+$  current ( $I_{KCa}$ )***

$$I_{KCa} = g_{mKCa} d_{KCa} (V_P - E_K), \quad (9)$$

$$d_{KCa} = \frac{[Ca^{2+}]_c^4}{[Ca^{2+}]_c^4 + (0.25)^4} \quad (10)$$

where  $g_{mKCa} = 10$  pS.

***Slow activated  $Ca^{2+}$ -sensitive  $K^+$  channels***

$$I_{KCas} = g_{mKCas} d_{KCas} (V_P - E_K), \quad (11)$$

$$\frac{d d_{KCas}}{dt} = \frac{d_{KCasb} - d_{KCas}}{\tau_{dKCas}} \quad (12)$$

$$d_{KCasb} = \frac{[Ca^{2+}]_c^4}{[Ca^{2+}]_c^4 + (0.25)^4} \quad (13)$$

where  $g_{mKCas} = 90$  pS,  $\tau_{dKCas} = 2300$  mc.

***ATP-sensitive K<sup>+</sup> channels current (I<sub>KATP</sub>).***

$$I_{KATP} = g_{mKATP} O_{KATP} (V_P - E_K), \quad (14)$$

where.

$$O_{KATP} = \frac{0.08 (1 + 2 [MgADP_f]_i / 17) + 0.89 ([MgADP_f]_i / 17)^2}{(1 + [MgADP_f]_i / 17)^2 (1 + 0.45 [MgADP_f]_i / 26 + [ATP_{free}]_i / 50)} \quad (15)$$

$$[MgADP_f]_i = 0.55 [ADP_f]_i \quad (16)$$

where  $O_{KATP}$  is the fraction of open  $K_{ATP}$  channels,  $[MgADP_f]_i$  is the concentrations of free Mg-bound ADP,  $g_{mKATP} = 30000$  pS,  $[ADP_f]_i = 20$   $\mu$ M.

***Plasma membrane Ca<sup>2+</sup> pump current (I<sub>Cap</sub>).***

$$I_{Cap} = P_{mCap} \frac{[Ca^{2+}]_{ci}^2}{[Ca^{2+}]_c^2 + (0.2)^2} \quad (17)$$

where  $P_{mCap} = 4300$  fA

***Na<sup>+</sup> background current (I<sub>Nab</sub>).***

$$I_{Nab} = g_{mNab} (V_P - E_{Na}) \quad (18)$$

where  $g_{mNab} = 12$  pS,  $E_{Na} = -70$  mV.

The differential equation describing time-dependent changes in the plasma membrane potential ( $V_p$ ) is the current balance equation:

$$-C_m \frac{dV_p}{dt} = I_{V_{Ca}} + I_{K_r} + I_{K_{ATP}} + I_{K_{Ca}} + I_{K_{Cas}} + I_{Cap} + I_{Nab} \quad (19)$$

where  $C_m$  is the whole cell membrane capacitance. The PM currents are listed in Figure 1.

Based on the consideration in our general model (41) and including only  $I_{V_{Ca}}$  and  $I_{Cap}$ , the equations for  $[Ca^{2+}]_i$  dynamics can be written as:

$$\frac{d[Ca^{2+}]_c}{dt} = \frac{f_i (-I_{V_{Ca}} - 2I_{Cap})}{2 F V_i} - k_{sg} [Ca^{2+}]_c \quad (20)$$

where  $f_i$  is the fraction of free  $Ca^{2+}$  in cytoplasm,  $F$  is Faraday's constant,  $V_i$  is the effective volumes of the cytosolic compartment, and  $k_{sg}$  is a coefficient of the sequestration rate of  $[Ca^{2+}]_c$ .

**REFERENCES**

- 1. Fridlyand LE, Tamarina N, and Philipson LH.** Modeling of Ca<sup>2+</sup> flux in pancreatic beta-cells: role of the plasma membrane and intracellular stores. *Am J Physiol Endocrinol Metab* 285: E138-154, 2003.
- 2. Gopel SO, Kanno T, Barg S, Eliasson L, Galvanovskis J, Renstrom E, and Rorsman P.** Activation of Ca(2+)-dependent K(+) channels contributes to rhythmic firing of action potentials in mouse pancreatic beta cells. *J Gen Physiol* 114: 759-770, 1999.
